1 RNA-seq analysis of skeletal muscle in motor neurone disease

2 cases and controls

3 Anna Freydenzon<sup>1,\*</sup>, Shivangi Wani<sup>1</sup>, Vanda Bharti<sup>1</sup>, Leanne M. Wallace<sup>1</sup>,

4 Anjali K. Henders<sup>1</sup>, Pamela A. McCombe<sup>2,3</sup>, Robert D. Henderson<sup>2,3</sup>, Frederik

5 J. Steyn<sup>2,4</sup>, Naomi R. Wray<sup>1,5</sup>, Shyuan T. Ngo<sup>2,3,5,6,+</sup>, Allan F. McRae<sup>1,+</sup>

6

7 1 Institute for Molecular Bioscience; The University of Queensland; St Lucia,

8 QLD, 4072; Australia

9 2 Centre for Clinical Research (CCR); The University of Queensland; Herston,

10 QLD, 4029; Australia

11 3 Department of Neurology; Royal Brisbane and Women's Hospital; Brisbane,

12 QLD, 4029; Australia

13 4 The School of Biomedical Sciences; The University of Queensland;

14 Brisbane, QLD, 4072; Australia

15 5 Queensland Brain Institute; The University of Queensland; Brisbane, QLD,

16 4072; Australia

17 6 Australian Institute for Bioengineering and Nanotechnology; The University

18 of Queensland; St Lucia, QLD, 4072; Australia

19

20 + These authors contributed equally

21 \* Correspondence: [a.freydenzon@uq.edu.au](mailto:a.freydenzon@uq.edu.au)

## 22 Author emails

23 Anna Freydenzon: [a.freydenzon@uq.edu.au](mailto:a.freydenzon@uq.edu.au)

24 Shivangi Wani: [s.wani@uq.edu.au](mailto:s.wani@uq.edu.au)

25 Vanda Bharti: [v.bharti@uq.edu.au](mailto:v.bharti@uq.edu.au)

26 Leanne M. Wallace: [l.wallace@uq.edu.au](mailto:l.wallace@uq.edu.au)

27 Anjali K. Henders: [a.henders@uq.edu.au](mailto:a.henders@uq.edu.au)

28 Pamela A. McCombe: [pamela.mccombe@uq.edu.au](mailto:pamela.mccombe@uq.edu.au)

29 Robert D. Henderson: [Robert.Henderson@health.qld.gov.au](mailto:Robert.Henderson@health.qld.gov.au)

30 Frederik J. Steyn: [f.steyn@uq.edu.au](mailto:f.steyn@uq.edu.au)

31 Naomi R. Wray: [naomi.wray@uq.edu.au](mailto:naomi.wray@uq.edu.au)

32 Shyuan T. Ngo: [s.ngo@uq.edu.au](mailto:s.ngo@uq.edu.au)

## 33 Abstract

34 **Background:** Amyotrophic lateral sclerosis (ALS), the most predominant form of Motor  
35 Neuron Disease (MND), is a progressive and fatal neurodegenerative condition that spreads  
36 throughout the neuromotor system by afflicting upper and lower motor neurons. Lower motor  
37 neurons project from the central nervous system and innervate muscle fibres at motor  
38 endplates, which degrade over the course of the disease leading to muscle weakness. The  
39 direction of neurodegeneration from or to the point of neuromuscular junctions and the role of  
40 muscle itself in pathogenesis has continued to be a topic of debate in ALS research.

41 **Methods:** To assess the variation in gene expression between affected and nonaffected  
42 muscle tissue that might lead to this local degeneration of motor units, we generated RNA-  
43 seq skeletal muscle transcriptomes from 28 MND cases and 18 healthy controls and  
44 conducted differential expression analyses on gene-level counts, as well as an isoform  
45 switching analysis on isoform-level counts.

46 **Results:** We identified 52 differentially-expressed genes (Benjamini-Hochberg-adjusted  
47  $p < 0.05$ ) within this comparison, including 38 protein coding, 9 long non-coding RNA, and  
48 5 pseudogenes. Of protein-coding genes, 31 were upregulated in cases including with  
49 notable genes including the collagenic *COL25A1* ( $p = 3.1 \times 10^{-10}$ ), *SAA1* which is released  
50 in response to tissue injury ( $p = 3.6 \times 10^{-5}$ ) as well as others of the SAA family, and the  
51 actin-encoding *ACTC1* ( $p = 2.3 \times 10^{-5}$ ). Additionally, we identified 17 genes which  
52 exhibited a functional isoform switch with likely functional consequences between cases and  
53 controls.

54 **Conclusions:** Our analyses provide evidence of increased tissue generation in MND cases,  
55 which likely serve to compensate for the degeneration of motor units and skeletal muscle.

## 56 **Keywords**

57 Amyotrophic lateral sclerosis, ALS, motor neurone disease, transcriptomics, RNA-seq,  
58 differential expression, alternative splicing

## 59 **Background**

60 Motor neuron disease (MND) is a group of several similar neurodegenerative disorders with  
61 highly variable patterns of onset, progression, and symptomology. Amyotrophic lateral  
62 sclerosis (ALS), the most predominant motor neuron disease, is identified as featuring both  
63 upper and lower motor neuron loss. There is active discussion as to whether MND operates  
64 as a ‘dying forward’ phenomenon where initial cell death occurs in the cortical motor  
65 neurons and extends down into the corticospinal projections (1), or a ‘dying back’  
66 phenomenon where neuromuscular junctions (NMJs) are the first to suffer failure and the  
67 pathology proceeds up the axon back into the body of the motor neuron (2). Nevertheless, the  
68 progressive loss of upper and lower motor neurons results in the presentation of clinical

69 features including spasticity and brisk reflexes, and muscle weakness and wasting across  
70 multiple body regions (3). In MND, muscle weakness and wasting occurs in response to the  
71 dismantling of neuromuscular junctions (NMJs) and axonal retraction that ultimately results  
72 in the denervation of skeletal muscle and subsequent die-off (4). Compensatory mechanisms  
73 can be seen in surviving motor units; axon terminals undergo sprouting to markedly increase  
74 reinnervation of skeletal muscle, and this occurs in parallel with abnormally fast firing (5).

75 MND is a highly polygenic disease consisting of over 20 known associated genes, although  
76 only ~10% of patients have familial history associated with mutations of large effect (4). One  
77 functional mechanism implicated by MND-associated genes is disturbance in RNA  
78 metabolism, which has contributed to an increasing research focus exploring transcriptomic  
79 machinery (6). One of the most notable genes is *TDP-43*, which undergoes substantial  
80 posttranslational modification and aggregation in both MND and frontotemporal dementia  
81 (7), leading to targeted RNA instability in its overexpression that results in consequences for  
82 ribosome biogenesis and oxidative phosphorylation pathways (8). Similarly, *FUS* is involved  
83 in transcriptional regulation through binding to RNA targets to regulate splicing and the  
84 removal of minor introns (9). Recent transcriptome-wide studies have been conducted on a  
85 variety of different tissues and models to find aberrant differential gene expression reflected  
86 in all tested tissue types, including but not limited to the postmortem motor cortex (10),  
87 patient whole blood (11), motor neurons from stem-cell derived spinal motor axons (12), and  
88 spinal cords from the recently generated *PFN1* mouse model (13). Here, we report a whole  
89 transcriptome analysis of skeletal muscle tissue from MND patients, and describe the  
90 compensatory mechanisms invoked within MND-afflicted muscle tissue in response to  
91 denervation and local cell death.

## 92 **Methods**

### 93 **Patient recruitment**

94 Patient recruitment and muscle biopsies were undertaken as described by Steyn et al. 2020  
95 (14). Briefly, MND patients who met the revised El-Escorial criteria for ALS (15) at the time  
96 of diagnosis were enrolled from the Royal Brisbane and Women's Hospital MND clinic for  
97 the collection of skeletal muscle biopsies, along with healthy controls in the form of relatives,  
98 friends or community volunteers. For all participants, exclusion criteria were history of a  
99 metabolic condition (e.g. Hashimoto's disease) and diabetes mellitus. Participants involved in  
100 the study are described in **Table S1**. Muscle biopsies (~200mg) were collected from the  
101 vastus lateralis from one leg (the least affected leg for MND participants) using a hollow  
102 Bergstrom biopsy needle modified for suction. Samples were placed in Dulbecco's Modified  
103 EagleMedium/Ham's F-12 with 0.5% gentamicin for transport to the laboratory. A portion  
104 (~50-100mg) of muscle tissue was divided from the primary biopsy, washed three times with  
105 room temperature phosphate buffered saline, frozen on dry ice, and stored at -80 degrees  
106 Celsius.

### 107 **RNA sequencing**

108 RNA sequencing was performed on MND and healthy controls for both blood and muscle  
109 samples (36 overlapping; 23 cases, 13 controls). RNAseq was performed first on an initial  
110 batch with all blood and muscle samples, followed by the same muscle samples being re-run  
111 once (split across two additional batches) to increase total sequencing reads.

### 112 **Muscle**

113 Muscle samples passing QC were contributed by 17 healthy controls and 28 MND cases.

114 Total RNA was extracted from the muscle tissue using a standard Trizol-chloroform  
115 extraction method. Post extraction, the total RNA was quantitated using the Epoch microplate  
116 spectrophotometer followed by quality assessment on the Agilent Bioanalyzer using the RNA  
117 Nano kit. On average the samples yielded 7.4 micrograms of total RNA with an average  
118 RNA Integrity Number (RIN) of 8.2.

119 One microgram of DNaseI treated total RNA was then used to prepare libraries for  
120 sequencing. The libraries were prepared using Illumina's Truseq stranded total RNA library  
121 prep gold kit in conjunction with the TruSeq RNA UD indexes. The libraries were then  
122 equimolar pooled and paired end sequencing was carried out on HiSeq 4000 system.

### 123 **Blood**

124 Blood samples passing QC were contributed to by 13 healthy controls and 24 MND cases.  
125 Approximately 2.5mL of whole blood was collected in PAXgene Blood RNA tubes. Total  
126 RNA was extracted from these tubes using the PAXgene Blood RNA kit from Qiagen. Post  
127 extraction, the total RNA was quantitated using the Nanodrop spectrophotometer followed by  
128 quality assessment on the Agilent Bioanalyzer using the RNA Nano kit. On average the  
129 samples yielded 4.8 micrograms of total RNA with an average RNA Integrity Number (RIN)  
130 of 8.2.

131 500ng of DNaseI treated total RNA was then used to prepare libraries for sequencing. The  
132 libraries were prepared using Illumina Truseq stranded total RNA library prep gold kit in  
133 conjunction with the TruSeq RNA UD indexes. The libraries were then equimolar pooled and  
134 paired end sequencing was carried out on HiSeq 4000 system.

### 135 **Read processing**

136 Initial QC and read trimming was undertaken using fastp (16), setting a threshold of 1 to pass

137 through all non-empty reads (aberrant reads being filtered in the alignment step). By default,  
138 fastp conducts automatic adapter trimming by overlapping read pairs, as well as N-based  
139 qualify filtering and polyG tail trimming.

140 Trimming reads were mapped to the GENCODE v32-indexed genome through STAR 2.7.3  
141 (17) with non-default parameters suggested by the STAR 2.7.0 manual for ENCODE  
142 alignment. These parameters specify that splices are only recognized if they fall over  
143 indexed, known splice junctions, sets a maximum number of mismatches to be read length\*  
144 0.04, limits genomic distance between read mates to 1,000,000 and sets a minimum intron  
145 length of 20bp.

146 The STAR-generated genome alignments were then quantified to gene meta-features through  
147 Rsubread featurecounts (18), with the parameter requiring both pairs to be mapped. Samples  
148 with alignment counts of < 20,000,000 across summed technical replicates were  
149 consequently filtered out of the analysis (4 blood, 1 muscle).

150 In addition, Salmon 1.0 (19) was run in quasi-mapping mode to the GENCODE v32  
151 transcriptome (indexed over *k*-mer length 17). This was done to verify signals detected in  
152 STAR and act as a definitive source of transcripts as compared to the finer STAR genomic  
153 alignment method. This was run with the non-default parameters of validateMappings,  
154 seqBias, gcBias and useEM. This automatically estimates the library type (paired), runs in  
155 selective alignment mode where it ranks potential alignment sites based on mapping score,  
156 corrects for hexamer priming and GC biases and uses the expectation maximization (EM)  
157 method for abundance estimates.

158 Tximport 1.20 (20) was used to aggregate the Salmon transcript counts across samples to  
159 acquire both the summarized gene counts for the analysis complimentary to STAR, as well as

160 the counts of the transcripts for differential isoform analyses.

## 161 Differential expression analyses

162 STAR-generated read counts were read into DESeq2 1.30.1 (21) to collapse replicates into a  
163 single measure, and to estimate size factors and dispersion factors. Genes with  $\geq 3$  samples  
164 with normalized counts  $\leq 5$  were pruned from the individual blood and muscle sets. The  
165 resulting subset of genes were then run through DESeq2's negative binomial GLM with a  
166 Wald significance test, increasing maximum iterations to 5,000.

167 The muscle and blood GLMs were fitted with MND as the condition and age and sex as  
168 covariates. Additionally, a binary variable indicating whether the samples were replicated  
169 across the second or third batch was added to the muscle model. These preliminary models  
170 were designated as the 'base' models.

171 The variation in counts was visualized within the muscle and blood samples through a  
172 principal component analysis applied to the 500 genes with highest variance across all  
173 samples, as well as through plotting the relative log expression on both centered and non-  
174 centered counts. Two control muscle samples were consequently dropped from further  
175 analysis due to featuring highly irregular counts and variance.

176 The genomic inflation factor (GIF) for each analysis (blood and muscle) was calculated as  
177 the median of the  $\chi^2$  test statistic divided by the median of the  $\chi^2$  distribution with one  
178 degree of freedom (22). The GIF is a summary statistic that compares the distribution of test  
179 statistics against expectation under the null hypothesis of no association of gene expression  
180 with MND and has an expected value of 1 when confounding is absent from the data, under  
181 the assumption that at least 50% of tests represent truly null associations. The GIF of the  
182 muscle models was found to be high, and as such a surrogate variable analysis (SVA) was



183 conducted individually for blood and muscle using the R `sva` 3.38 package (23). SVA  
184 analysis estimates the probability of each gene being an empirical control gene (i.e., not  
185 associated with MND) through an iterative re-weighted least squares regression and captures  
186 variation outside of a specified model with known covariates. In this case, the SVA was  
187 conducted with MND status as the only covariate to preserve in the non-null model. This  
188 function also generated a suggested number of SVs to use in differential expression analysis  
189 through a permutation procedure.

190 Genes with Benjamini-Hochberg-adjusted  $p$ -values falling under the significance threshold of  
191 0.05 were deemed as transcriptome-wide significant and were taken forward for further  
192 enrichment analyses. The union of genes significant to Salmon and STAR models formed the  
193 gene list entered `gprofiler2` 0.2 (24) gene ontology enrichment and the STRING 11.0 (25)  
194 protein-protein interaction network tools using default settings. The  $p$ -values returned by this  
195 enrichment analysis are adjusted for multiple testing by `gprofiler2`'s default `gSCS` algorithm.  
196 Additionally, a supplementary analysis was conducted with the Revised Amyotrophic Lateral  
197 Sclerosis Functional Rating Scale (ALSFRS-R) (26) lower limb subscore as the outcome,  
198 adjusting for age, sex and the estimated surrogate variables. This subscore combined scored  
199 answers for questions relating to the ability to walk and the ability to climb stairs, with lower  
200 values reflecting decreased ability.

201 Finally, the isoform-level length-scaled transcript counts generated by Salmon for the muscle  
202 data were analyzed through the `IsoformSwitchAnalyzeR` (27) 1.12 library in R. This package  
203 implements visualization and annotation functions on top of a DEXSeq, which currently  
204 implements DESeq2's normalization and estimation approaches to iteratively compare the  
205 number of transcripts of a given exon compared to the rest of that gene (28) but in this case  
206 for isoforms. Isoforms were annotated to exons through the Gencode v32 primary assembly.

207 Following default prefiltering, isoforms were tested for differential usage using MND status  
208 as its condition, adjusted for age, sex and batch effect, then analyzed for alternative splicing  
209 as well as predicted the open reading frame (ORF) of each isoform of significantly switched  
210 genes. IsoFormSwitchAnalyzer implements multiple functions for the export of all isoform  
211 sequences for genes with a significant switch, and the import of the results from external  
212 annotation databases utilizing these. The databases were CPAT (using the suggested human  
213 coding threshold of 0.364) (29) for coding potential, SignalP (30) for predicting signal  
214 peptide sites, IUPred2A (31) to predict intrinsically disordered regions (IDRs) and Pfam (32)  
215 to predict protein domains.

## 216 **Results**

217 Quality control of the RNAseq reads for each sample using PHRED scores indicated the  
218 quality was high, with the main batch containing mean scores at each base pair across reads  
219 and samples of  $> 30$ . However, the samples demonstrated some form of degradation  
220 (potentially from long-term storage), particularly for blood. Mean genome alignment over all  
221 blood and muscle samples through STAR was 54.4% and 87.6% respectively, while the  
222 proportion of those which were assigned to exons were 29.8% and 58.2% respectively. For  
223 Salmon, a mean of 74.1% of reads mapped to the transcriptome and were successfully  
224 assigned a feature in muscle, whereas this number was only 40% in blood. The proportions  
225 of the reads successfully assigned to a feature are plotted in **Figure S1** for STAR and **Figure**  
226 **S2** for Salmon.

227 A principal component analysis of the transcript levels revealed a differing pattern of  
228 variation between the blood and muscle analyses (**Figure 1**). The second principal  
229 component of both blood and muscle (explaining 7.2% and 8.4% of variance in gene  
230 expression, respectively), captured sex differences (correlation  $r = 0.90$  with  $p = 4.9 \times$

231  $10^{-14}$  for blood, and  $r = -0.89$  with  $p = 2.6 \times 10^{-16}$  for muscle). The first principal  
232 component in muscle (explaining 22.3% of expression variance) captured differences  
233 between cases and controls. The second principal component in muscle is significantly  
234 correlated with the lower limb subscore of the ALSFRS-R when estimating the PCA in case  
235 counts only ( $r = 0.46$ ,  $p = 0.014$ ). The relative log expression of the counts (centered and  
236 non-centered) passing QC is displayed within **Figure S3**. Similar observations with regards  
237 to the principal components and correlations apply to the counts as generated through STAR  
238 (**Figure S4**).

239 Testing for case-control differences in gene-expression levels in muscle while correcting for  
240 age, sex and replicate batch effect identified additional confounding within the data. The  
241 genomic inflation factor (GIF) of Salmon and STAR were 2.53 and 3.47 respectively, with  
242 3258 and 6874 transcriptome-wide significant genes detected under the adjusted p-value of  
243 0.05 (**Figure S5**). This was corrected with the addition of an automatically determined  
244 number of surrogate variables to each model as calculated by permutation procedure. With  
245 this correction the GIF falls to 1.18 and 1.13, with 38 and 26 significant genes for Salmon  
246 and STAR-aligned data respectively. For the blood transcriptome analysis, such inflation was  
247 not an issue (a GIF of 0.85 and 1.01 in Salmon and STAR respectively, with two significant  
248 genes each) and as such no SVs were added to the model.

249 Of the 38 and 26 genes detected by Salmon and STAR respectively, there was an intersection  
250 of 12 (**Table 1**) with the same direction of fold change for both methods. The complete list of  
251 transcriptome-wide genes for each model in each tissue type as well as their test statistics can  
252 be found in individual tabs of **Table S2**. Of the 52 genes identified by either Salmon and  
253 STAR models, 9 were long non-coding RNAs and 5 were pseudogenes. Of the 38 protein-  
254 coding genes, 7 had lower expression and 31 had higher expression in MND cases versus

255 controls. As one of these genes, *AHRR*, is a known smoking biomarker in blood (33) we  
256 conducted an additional iteration of the ‘base’ model for muscle with the addition of ever-  
257 smoked status (23 never, 22 ever). MND status was found to be significantly associated with  
258 *AHRR* count in the STAR model ( $\log_2FC = 1.98$ ,  $p = 0.0085$ ), whereas smoking history was  
259 not ( $\log_2FC -0.11$ ,  $p = 0.88$ ).

260 A gene ontology enrichment analysis conducted on the results of each method (**Table 2**)  
261 revealed shared enrichment for the GO biological processes term of acute phase response  
262 ( $p = 1.4 \times 10^{-3}$  and  $p = 5.5 \times 10^{-4}$  for Salmon and STAR respectively), attributable to the  
263 components of serum amyloid A within the set. Other notable terms enriched in the  
264 significant results for Salmon were cardiac muscle tissue morphogenesis ( $p = 4.4 \times 10^{-3}$ ),  
265 positive regulation of synapse assembly ( $p = 4.7 \times 10^{-3}$ ), and tissue migration ( $p = 7.3 \times$   
266  $10^{-3}$ ). For STAR, notable terms were skeletal muscle tissue growth ( $p = 9.7 \times 10^{-3}$ ),  
267 axonogenesis involved in innervation ( $p = 8.4 \times 10^{-3}$ ) and neutrophil clearance ( $p = 7.0 \times$   
268  $10^{-3}$ ). However, these terms test as enriched due to having one or two significant genes  
269 detected from a small pool of other genes in the global set annotated with the term. The  
270 unified set of differentially expressed proteins between STAR and Salmon in muscle was  
271 identified to have significantly more interactions (9) than expected (4,  $p = 0.01$ ) according to  
272 the STRING pathway analysis, indicating a likely biological relation if not interaction  
273 between them (**Figure S6**).

274 Within the blood sample, the *ODZI* homolog pseudogene *AL0087071*, notably found on the  
275 X-chromosome, was the only gene differentially expressed by both Salmon and STAR  
276 methods (respective  $\log_2FC$ s of 3.14 and 3.07, with a  $p = 1.9 \times 10^{-6}$  and  $p = 3.5 \times 10^{-6}$ ,  
277 **Table S3**). *EDH2* was not detected by the STAR aligner though was significantly expressed  
278 in Salmon ( $\log_2FC$  of -1.75;  $p = 7.0 \times 10^{-7}$ ) and the expression of *FSDIL* was only found

279 significant in STAR ( $\log_2FC$  of 0.57;  $p = 2.0 \times 10^{-6}$ ).

280 The results of the supplementary analyses on the 28 cases in predicting the ALSFRS-R lower  
281 limb subscores are reported in **Table S4**. The STAR model identified 11 genes significantly  
282 expressed in change of scoring and the Salmon model identified 10, with 3 genes (*IGFNI*,  
283 *PBX1*, and *TMEM9*) sharing association in both. Both models were adjusted for with two  
284 additional surrogate variables (as the number automatically suggested by the function).

285 A total of 17 genes were identified with isoform switches within the muscle sample falling  
286 underneath the FDR-adjusted p-value (q-value) of 0.05 and having predicted functional  
287 consequences to the expressed protein. The list of features, their direction of consequence and  
288 the genes falling under each is listed in **Table S5**. The individual per-isoform tests for each  
289 gene are available in **Table S6**. No significant ( $FDR < 0.05$ ) directionality of functional  
290 consequences of these isoform differences was observed for any genomic feature, although  
291 there was a slight increase in switching to longer transcripts (8:6 longer vs. shorter switches)  
292 and an increase in exon number gain (6:3 gain vs. loss of exon count).

293 From the isoform switches with functional consequences, only *SAA2* was represented within  
294 our main gene-level analysis. *SAA2* featured an increase of its ENST00000256733 isoform  
295 fraction by 24% ( $q = 5.74 \times 10^{-11}$ ) correlated with a decrease of its ENST00000528349  
296 isoform fraction by 25% ( $q = 9.84 \times 10^{-11}$ ). The resulting functional consequence was an  
297 overall decrease in transcript length by a shortened 3' UTR and the reduction of intron 3-4  
298 from 3090 to 394 bp, increasing its predicted coding potential (**Figure 2**). Two other isoform  
299 switches with predicted gain in coding potential are *PLCE1* (**Figure S7**) and *SAMD4A*  
300 (**Figure S8**). *PIP5K1B* (**Figure S9**) and *MYH3* (**Figure S10**) also have gain in domains  
301 which indicate that the isoform with increased expression encodes the more complete version  
302 of the protein.

## 303 **Discussion**

304 The majority of studies on muscle changes associated with MND have been performed in  
305 mice (34,35) or iPSC-derived cell-culture (36). To our knowledge, our study is one of the  
306 first investigations into the transcriptomic machinery in human MND muscle tissue and  
307 provides a substantial increase in the number of individuals examined. We identify 38  
308 protein-coding genes differentially expressed between MND cases and controls with 31 of  
309 these being upregulated in cases. Muscle biopsies were sampled from the healthier leg in  
310 MND cases.

311 Serum amyloid A transcripts (specifically *SAA1*, *SAA2* and the *SAA2-SAA4* readthrough,  
312 contiguously located on chromosome 11) were highly expressed in MND patients. SAA is  
313 persistently elevated in other chronic inflammatory diseases and a reliable indicator of  
314 inflammation due to an up-to 1000-fold increase in plasma levels during acute phase  
315 responses (37). In a heightened response, SAA most often becomes associated with the lipid  
316 surface of high-density lipoproteins (HDLs), possibly as a stabilized hub to interact with  
317 other cellular components (38). In its association with HDL cholesterol, SAA is indicated to  
318 be involved in stimulating the inflammatory response within the innate immune system (39).  
319 Other acute phase proteins such as C-reactive protein and CD14 have been detected as  
320 elevated in MND sera, and increased levels of these are reported to be associated with disease  
321 progression and mortality rate (40). In addition to the aforementioned acute phase proteins,  
322 several components of the complement system including C3 (41), C4 (42), and C5a/C5b-9  
323 (43) have been reported to be higher in the whole blood, serum or plasma of ALS cases to  
324 controls in previous studies. As such, it may be of value in the future to investigate local  
325 accumulation of SAA as a biomarker for disease progression and as a representation of the  
326 overall inflammatory response.

327 Several genes associated with tissue generation are detected as positively expressed in cases.  
328 *FST* (follistatin) is a receptor agonist which binds to other transforming growth factor- $\beta$   
329 ligands, including myostatin and activin-A which would otherwise limit muscle mass without  
330 inhibition (44). Additionally, *FST* has an antagonistic effect on several bone morphogenic  
331 proteins, of which it forms a complex with and alters signaling to induce muscle hypertrophy  
332 while reducing atrophy (45). *MYH3*, a myosin heavy-chain encoding gene primarily  
333 expressed embryonically, was not captured by the gene-based analyses; however, the  
334 differential isoform expression analysis indicated a heightened expression of its most  
335 complete isoform within MND cases. This is of particular interest as *MYH3* has been  
336 indicated as a valid and robust biomarker for skeletal muscle tissue regeneration across all  
337 ages in other muscle-wasting diseases such as Duchenne muscular dystrophy (46). Muscle  
338 tissue does not exist in the body solely as actin filaments, but bundled within a complex net  
339 of connective tissue and infiltrating immune cells (47). Other genes instrumental in tissue  
340 development and differentiation found expressed higher in cases are the keratin *KRT80* (48),  
341 the actin-binding protein encoding *SHROOM3* which is utilized for epithelial folding in  
342 neural tube closure (49), and filamentous actin-binding ectodermal-neural cortex 1 *ENC1*  
343 (50).

344 Several transcripts found over-expressed in MND cases are not principally expressed by  
345 skeletal muscle tissues in adulthood. For instance, *ACTC1* was found to be significantly  
346 upregulated but not *ACTA1*. *ACTC1* encodes the  $\alpha$ -cardiac muscle actin which constitutes  
347 < 5% of skeletal muscle by adulthood, whereas *ACTA1* encodes the almost-identical  
348 predominant muscular isoform  $\alpha$ -skeletal muscle actin (51). Within a small case study of 7  
349 congenital myopathy patients with a complete lack of  $\alpha$ -skeletal muscle actin,  $\alpha$ -cardiac actin  
350 was shown to constitute muscle tissues and the highest amount correlated to the participant  
351 with the best muscular function (52). However, as *ACTA1* has been previously identified to

352 be increased as a function of compensatory hypertrophy in a small real-time PCR study of 5  
353 ALS patients, a larger sample size may capture the increased expression of both it and  
354 *ACTC1* (53). *ANKRD1/CARP* is the ankryn repeat domain most present in cardiac tissue and  
355 is shown to be over-expressed within MND muscle compared to controls unlike its skeletal  
356 muscle paralog, *ANKRD2/ARPP*. However, *ANKRD1* expression has also been noted to  
357 increase in skeletal muscle with denervation-induced atrophy in murine models (54).

358 The expression of extracellular matrix components and collagens *COL19A1* and *COL25A1*  
359 was also found to be increased with muscle tissue genes such as *ACTC1*. *COL25A1*, encoding  
360 the collagen type XXV alpha 1 chain, is a known Alzheimer's risk gene (55) for its role in  
361 assisting the formation of characteristic senile plaques when over-expressed in the brain (56).  
362 The cleavage of *COL25A1* creates the proteolytic CLAC (collagenous Alzheimer amyloid  
363 plaque component), and as such has the alias of *CLAC-P* (precursor) (57). Collagen XXV is  
364 expressed primarily in skeletal muscle during development, acting as a required factor in  
365 myofiber fusion from myoblasts in early myogenesis (58). *COL25A1*-KO mice nearly  
366 completely failed to innervate skeletal muscle tissue during development by not being able to  
367 elongate and branch motor axon bundles, indicating it as a required component to initial  
368 intramuscular motor innervation (59). Collagen XIX structures part of the basement  
369 membranes, and is present in a host of different tissues including skeletal muscle, axons,  
370 epithelia and brain intraneurons (60). As collagens are vital in the production of functional  
371 skeletal muscle tissue, their increased expression in MND further supports the evidence of  
372 attempted muscle repair as a compensatory response. Higher *COL19A1* expression levels in  
373 MND muscle biopsies have already been linked to faster progression of the disease (61).

374 A few other highly upregulated genes of note include some that are influenced by the  
375 multiple upregulated transcription factors in the set (*SPI* and *MYCL*). The increased



376 expression of *TDO2* and *AHR* may indicate the presence of prior *AHR* upregulation, which  
377 has been indicated to be invoked in neural cell proliferation (62). Following *AHR* and the  
378 aforementioned *SAAI*, tryptophan catabolism enzyme *TDO2* has the largest positive fold-  
379 change in expression. *TDO2* is ordinarily expressed in the liver as a tryptophan regulator and  
380 is also known as an oncogene commonly expressed in most cancers (63). While the products  
381 of the catabolic kynurenine pathway include metabolites used for neurotransmission and  
382 immune regulation, *TDO2* depletes free tryptophan used for proliferation of T-cells and  
383 produces kynurenine that inhibits the proliferation of effector T lymphocytes and promoting  
384 regulatory T-cell differentiation, and activates the transcription factor *AHR* (64). The  
385 kynurenine pathway itself produces metabolites that influence energy homeostasis in skeletal  
386 muscle and other tissues, and kynurenic acid (a product of the pathway) increases energy  
387 utilization while also acting as an *AHR* ligand (65).

## 388 **Conclusions**

389 In summary, we identify 52 genes whose expression in muscle is significantly associated  
390 with MND cases versus controls, with the majority showing increased expression in cases.  
391 These genes encode vital structural components of muscle, particularly in regenerative or  
392 early developmental processes. This provides novel insight into the repair mechanisms  
393 triggered in the presence of neurodegeneration and muscle wasting in MND, as well as the  
394 chronic inflammation within these tissues as evidenced by expression of acute-phase  
395 proteins.

## 396 **Abbreviations**

397 *ALS-FRS-R*: Revised Amyotrophic Lateral Sclerosis Functional Rating Scale

|     |                       |                                     |
|-----|-----------------------|-------------------------------------|
| 398 | <b><i>ALS:</i></b>    | Amyotrophic lateral sclerosis       |
| 399 | <b><i>EM:</i></b>     | Expectation maximalization          |
| 400 | <b><i>GIF:</i></b>    | Surrogate variable analysis         |
| 401 | <b><i>lncRNA:</i></b> | Long non-coding RNA                 |
| 402 | <b><i>MND:</i></b>    | Motor neurone disease               |
| 403 | <b><i>NMJ:</i></b>    | Neuromuscular junction              |
| 404 | <b><i>ORF:</i></b>    | Open reading frame                  |
| 405 | <b><i>PC:</i></b>     | Protein coding                      |
| 406 | <b><i>PCA:</i></b>    | Principal component analysis        |
| 407 | <b><i>PP:</i></b>     | Processed pseudogene                |
| 408 | <b><i>RIN:</i></b>    | RNA integrity number                |
| 409 | <b><i>TUP:</i></b>    | Transcribed unprocessed pseudogene. |
| 410 | <b><i>UP:</i></b>     | Unprocessed pseudogene              |

## 411 **Declarations**

### 412 Ethics approval and content to participate

413 All work performed in this study was approved by the Royal Brisbane and Women's Hospital  
414 and University of Queensland human research ethics committees. All participants provided  
415 written informed consent.

416 Consent for publication

417 Not applicable.

418 Availability of data and materials

419 The data that support the findings of this study are available on request from the  
420 corresponding author. The raw transcript data are not publicly available due to ethical  
421 restrictions; however, gene and transcript counts have been made available. The datasets  
422 generated during and/or analysed during the current study are available in the University of  
423 Queensland data collection repository, <https://doi.org/10.48610/b722f1f>.

424 Competing interests

425 The authors declare that they have no competing interests.

426 Funding

427 This research was supported through funding from the Scott Sullivan MND Research  
428 Fellowship to S.T.N. (2015-2020; MND and Me Foundation and RBWH Foundation),  
429 FightMND Mid-Career Fellowship (to S.T.N.), MNDRA Charcot Grant (GIA 1701 to S.T.N.  
430 and F.J.S.), the National Health and Medical Research Council Australia (1101085 to S.T.N.  
431 and F.J.S., 1113400 & 1173790 to N.R.W.) and the Australian Research Council (Future  
432 Fellowship 200100837 to A.F.M.).

433 Authors' contributions

434 A.F., A.F.M., and N.R.W. wrote the paper. A.F. conducted the analyses. A.F.M., N.R.W.,  
435 and S.T.N. conceptualized this work. S.W and V.B. processed the samples for sequencing.  
436 L.M.W. and A.K.H. allocated laboratory resources and supervised sample processing. P.A.M.  
437 and R.D.H. provided samples. S.T.N. and F.J.S. performed the muscle biopsies. All authors  
438 read and approved the final manuscript.

439 Acknowledgements

440 The authors thank all patients and participants who provided biological samples for use in

441 this research.

## 442 **References**

- 443 1. Cappello V, Francolini M. Neuromuscular Junction Dismantling in Amyotrophic Lateral  
444 Sclerosis. *IJMS*. 2017 Oct 3;18(10):2092.
- 445 2. Manzano R, Toivonen JM, Moreno-Martínez L, Torre M, Moreno-García L, López-Royo T,  
446 et al. What skeletal muscle has to say in amyotrophic lateral sclerosis: Implications for  
447 therapy. *Br J Pharmacol*. 2021 Mar;178(6):1279–97.
- 448 3. Morris J. Amyotrophic Lateral Sclerosis (ALS) and Related Motor Neuron Diseases: An  
449 Overview. *The Neurodiagnostic Journal*. 2015 Sep;55(3):180–94.
- 450 4. Masrori P, Van Damme P. Amyotrophic lateral sclerosis: a clinical review. *Eur J Neurol*.  
451 2020 Oct;27(10):1918–29.
- 452 5. Weddell T, Bashford J, Wickham A, Iniesta R, Chen M, Zhou P, et al. First-recruited motor  
453 units adopt a faster phenotype in amyotrophic lateral sclerosis. *The Journal of*  
454 *Physiology [Internet]*. 2021 Jul 14 [cited 2021 Jul 20];n/a(n/a). Available from:  
455 <https://doi.org/10.1113/JP281310>
- 456 6. Taylor JP, Brown RH, Cleveland DW. Decoding ALS: from genes to mechanism. *Nature*.  
457 2016 Nov;539(7628):197–206.
- 458 7. Xue YC, Ng CS, Xiang P, Liu H, Zhang K, Mohamud Y, et al. Dysregulation of RNA-Binding  
459 Proteins in Amyotrophic Lateral Sclerosis. *Front Mol Neurosci*. 2020 May 29;13:78.
- 460 8. Tank EM, Figueroa-Romero C, Hinder LM, Bedi K, Archbold HC, Li X, et al. Abnormal RNA  
461 stability in amyotrophic lateral sclerosis. *Nat Commun*. 2018 Dec;9(1):2845.
- 462 9. Butti Z, Patten SA. RNA Dysregulation in Amyotrophic Lateral Sclerosis. *Front Genet*.  
463 2019 Jan 22;9:712.
- 464 10. Dols-Icardo O, Montal V, Sirisi S, López-Pernas G, Cervera-Carles L, Querol-Vilaseca M, et  
465 al. Motor cortex transcriptome reveals microglial key events in amyotrophic lateral  
466 sclerosis. *Neurol Neuroimmunol Neuroinflamm*. 2020 Sep;7(5):e829.
- 467 11. van Rheenen W, Diekstra FP, Harschnitz O, Westeneng HJ, van Eijk KR, Saris CGJ, et al.  
468 Whole blood transcriptome analysis in amyotrophic lateral sclerosis: A biomarker study.  
469 Raoul C, editor. *PLoS ONE*. 2018 Jun 25;13(6):e0198874.
- 470 12. Nijssen J, Aguila J, Hoogstraaten R, Kee N, Hedlund E. Axon-Seq Decodes the Motor  
471 Axon Transcriptome and Its Modulation in Response to ALS. *Stem Cell Reports*. 2018  
472 Dec;11(6):1565–78.
- 473 13. Barham C, Fil D, Byrum SD, Rahmatallah Y, Glazko G, Kiaei M. RNA-Seq Analysis of Spinal  
474 Cord Tissues from hPFN1G118V Transgenic Mouse Model of ALS at Pre-symptomatic  
475 and End-Stages of Disease. *Scientific Reports*. 2018 Sep 13;8(1):13737.

- 476 14. Steyn FJ, Li R, Kirk SE, Tefera TW, Xie TY, Tracey TJ, et al. Altered skeletal muscle glucose-  
477 fatty acid flux in amyotrophic lateral sclerosis. *Brain Communications*. 2020 Sep  
478 24;fcaa154.
- 479 15. Brooks BR, Miller RG, Swash M, Munsat TL. El Escorial revisited: Revised criteria for the  
480 diagnosis of amyotrophic lateral sclerosis. *Ann Neurol*. 2000 Jan 1;1(5):293–9.
- 481 16. Chen S, Zhou Y, Chen Y, Gu J. fastp: an ultra-fast all-in-one FASTQ preprocessor.  
482 *Bioinformatics*. 2018 Sep 1;34(17):i884–90.
- 483 17. Dobin A, Davis CA, Schlesinger F, Drenkow J, Zaleski C, Jha S, et al. STAR: ultrafast  
484 universal RNA-seq aligner. *Bioinformatics*. 2013 Jan;29(1):15–21.
- 485 18. Liao Y, Smyth GK, Shi W. The R package Rsubread is easier, faster, cheaper and better  
486 for alignment and quantification of RNA sequencing reads. *Nucleic Acids Research*. 2019  
487 May 7;47(8):e47–e47.
- 488 19. Patro R, Duggal G, Love MI, Irizarry RA, Kingsford C. Salmon provides fast and bias-aware  
489 quantification of transcript expression. *Nat Methods*. 2017 Apr;14(4):417–9.
- 490 20. Sonesson C, Love MI, Robinson MD. Differential analyses for RNA-seq: transcript-level  
491 estimates improve gene-level inferences. *F1000Res*. 2015;4:1521.
- 492 21. Anders S, Huber W. Differential expression of RNA-Seq data at the gene level – the  
493 DESeq package. *BMC Bioinformatics*. 2010;11:1–24.
- 494 22. Devlin B, Roeder K. Genomic Control for Association Studies. *Biometrics*.  
495 1999;55(4):997–1004.
- 496 23. Leek JT, Johnson WE, Parker HS, Jaffe AE, Storey JD. The sva package for removing batch  
497 effects and other unwanted variation in high-throughput experiments. *Bioinformatics*.  
498 2012 Mar 15;28(6):882–3.
- 499 24. Raudvere U, Kolberg L, Kuzmin I, Arak T, Adler P, Peterson H, et al. g:Profiler: a web  
500 server for functional enrichment analysis and conversions of gene lists (2019 update).  
501 *Nucleic Acids Research*. 2019 Jul 2;47(W1):W191–8.
- 502 25. Szklarczyk D, Gable AL, Lyon D, Junge A, Wyder S, Huerta-Cepas J, et al. STRING v11:  
503 protein–protein association networks with increased coverage, supporting functional  
504 discovery in genome-wide experimental datasets. *Nucleic Acids Research*. 2019 Jan  
505 8;47(D1):D607–13.
- 506 26. Cedarbaum JM, Stambler N, Malta E, Fuller C, Hilt D, Thurmond B, et al. The ALSFRS-R: a  
507 revised ALS functional rating scale that incorporates assessments of respiratory  
508 function. *Journal of the Neurological Sciences*. 1999 Oct 31;169(1):13–21.
- 509 27. Vitting-Seerup K, Sandelin A. IsoformSwitchAnalyzeR: analysis of changes in genome-  
510 wide patterns of alternative splicing and its functional consequences. *Bioinformatics*.  
511 2019 Nov 1;35(21):4469–71.

- 512 28. Anders S, Reyes A, Huber W. Detecting differential usage of exons from RNA-seq data.  
513 Genome Research. 2012 Oct 1;22(10):2008–17.
- 514 29. Wang L, Park HJ, Dasari S, Wang S, Kocher JP, Li W. CPAT: Coding-Potential Assessment  
515 Tool using an alignment-free logistic regression model. Nucleic Acids Research. 2013 Apr  
516 1;41(6):e74–e74.
- 517 30. Almagro Armenteros JJ, Tsirigos KD, Sønderby CK, Petersen TN, Winther O, Brunak S, et  
518 al. SignalP 5.0 improves signal peptide predictions using deep neural networks. Nature  
519 Biotechnology. 2019 Apr 1;37(4):420–3.
- 520 31. Mészáros B, Erdős G, Dosztányi Z. IUPred2A: context-dependent prediction of protein  
521 disorder as a function of redox state and protein binding. Nucleic Acids Research. 2018  
522 Jul 2;46(W1):W329–37.
- 523 32. Mistry J, Chuguransky S, Williams L, Qureshi M, Salazar GA, Sonnhammer ELL, et al.  
524 Pfam: The protein families database in 2021. Nucleic Acids Research. 2021 Jan  
525 8;49(D1):D412–9.
- 526 33. Reynolds LM, Wan M, Ding J, Taylor JR, Lohman K, Su D, et al. DNA Methylation of the  
527 Aryl Hydrocarbon Receptor Repressor Associations With Cigarette Smoking and  
528 Subclinical Atherosclerosis. Circulation: Cardiovascular Genetics. 2015 Oct 1;8(5):707–  
529 16.
- 530 34. Ehmsen JT, Kawaguchi R, Mi R, Coppola G, Höke A. Longitudinal RNA-Seq analysis of  
531 acute and chronic neurogenic skeletal muscle atrophy. Scientific Data. 2019 Sep  
532 24;6(1):179.
- 533 35. Gonzalez de Aguilar JL, Niederhauser-Wiederkehr C, Halter B, De Tapia M, Di Scala F,  
534 Demougin P, et al. Gene profiling of skeletal muscle in an amyotrophic lateral sclerosis  
535 mouse model. Physiological Genomics. 2008 Jan 1;32(2):207–18.
- 536 36. Lynch EM, Robertson S, FitzGibbons C, Reilly M, Switalski C, Eckardt A, et al.  
537 Transcriptome analysis using patient iPSC-derived skeletal myocytes: Bet1L as a new  
538 molecule possibly linked to neuromuscular junction degeneration in ALS. Experimental  
539 Neurology. 2021 Nov 1;345:113815.
- 540 37. Ye RD, Sun L. Emerging functions of serum amyloid A in inflammation. Journal of  
541 Leukocyte Biology. 2015 Dec;98(6):923–9.
- 542 38. Webb NR. High-Density Lipoproteins and Serum Amyloid A (SAA). Curr Atheroscler Rep.  
543 2021 Feb;23(2):7.
- 544 39. Sack GH. Serum amyloid A – a review. Mol Med. 2018 Dec;24(1):46.
- 545 40. Beers DR, Zhao W, Neal DW, Thonhoff JR, Thome AD, Faridar A, et al. Elevated acute  
546 phase proteins reflect peripheral inflammation and disease severity in patients with  
547 amyotrophic lateral sclerosis. Sci Rep. 2020 Dec;10(1):15295.

- 548 41. Chen X, Feng W, Huang R, Guo X, Chen Y, Zheng Z, et al. Evidence for peripheral immune  
549 activation in amyotrophic lateral sclerosis. *Journal of the Neurological Sciences*. 2014  
550 Dec 15;347(1):90–5.
- 551 42. Kjældgaard AL, Pilely K, Olsen KS, Øberg Lauritsen A, Wørlich Pedersen S, Svenstrup K, et  
552 al. Complement Profiles in Patients with Amyotrophic Lateral Sclerosis: A Prospective  
553 Observational Cohort Study. *J Inflamm Res*. 2021;14:1043–53.
- 554 43. Mantovani S, Gordon R, Macmaw JK, Pfluger CMM, Henderson RD, Noakes PG, et al.  
555 Elevation of the terminal complement activation products C5a and C5b-9 in ALS patient  
556 blood. *J Neuroimmunol*. 2014 Nov 15;276(1–2):213–8.
- 557 44. Lee SJ, Lee YS, Zimmers TA, Soleimani A, Matzuk MM, Tsuchida K, et al. Regulation of  
558 muscle mass by follistatin and activins. *Mol Endocrinol*. 2010/09/01 ed. 2010  
559 Oct;24(10):1998–2008.
- 560 45. Winbanks CE, Chen JL, Qian H, Liu Y, Bernardo BC, Beyer C, et al. The bone  
561 morphogenetic protein axis is a positive regulator of skeletal muscle mass. *Journal of*  
562 *Cell Biology*. 2013 Oct 21;203(2):345–57.
- 563 46. Guiraud S, Edwards B, Squire SE, Moir L, Berg A, Babbs A, et al. Embryonic myosin is a  
564 regeneration marker to monitor utrophin-based therapies for DMD. *Human Molecular*  
565 *Genetics [Internet]*. 2018 Oct 9 [cited 2022 Feb 24]; Available from:  
566 <https://academic.oup.com/hmg/advance-article/doi/10.1093/hmg/ddy353/5124574>
- 567 47. Mukund K, Subramaniam S. Skeletal muscle: A review of molecular structure and  
568 function, in health and disease. *WIREs Systems Biology and Medicine*. 2020 Jan  
569 1;12(1):e1462.
- 570 48. Li C, Liu X, Liu Y, Liu X, Wang R, Liao J, et al. Keratin 80 promotes migration and invasion  
571 of colorectal carcinoma by interacting with PRKDC via activating the AKT pathway. *Cell*  
572 *Death Dis*. 2018 Oct;9(10):1009.
- 573 49. Haigo SL, Hildebrand JD, Harland RM, Wallingford JB. Shroom Induces Apical  
574 Constriction and Is Required for Hingepoint Formation during Neural Tube Closure.  
575 *Current Biology*. 2003 Dec;13(24):2125–37.
- 576 50. Cui Y, Yang J, Bai Y, Li Q, Yao Y, Liu C, et al. ENC1 Facilitates Colorectal Carcinoma  
577 Tumorigenesis and Metastasis via JAK2/STAT5/AKT Axis-Mediated Epithelial  
578 Mesenchymal Transition and Stemness. *Front Cell Dev Biol*. 2021 Mar 16;9:616887.
- 579 51. Sztal TE, McKaige EA, Williams C, Ruparella AA, Bryson-Richardson RJ. Genetic  
580 compensation triggered by actin mutation prevents the muscle damage caused by loss  
581 of actin protein. *Stainier Dyr, editor. PLoS Genet*. 2018 Feb 8;14(2):e1007212.
- 582 52. Nowak KJ, Sewry CA, Navarro C, Squier W, Reina C, Ricoy JR, et al. Nemaline myopathy  
583 caused by absence of  $\alpha$ -skeletal muscle actin. *Ann Neurol*. 2007 Feb;61(2):175–84.



- 584 53. Jensen L, Jørgensen LH, Bech RD, Frandsen U, Schrøder HD. Skeletal Muscle Remodelling  
585 as a Function of Disease Progression in Amyotrophic Lateral Sclerosis. *Biomed Res Int*.  
586 2016;2016:5930621.
- 587 54. Laure L, Suel L, Roudaut C, Bourg N, Ouali A, Bartoli M, et al. Cardiac ankyrin repeat  
588 protein is a marker of skeletal muscle pathological remodelling: Cardiac ankyrin repeat  
589 protein in muscle plasticity. *FEBS Journal*. 2009 Feb;276(3):669–84.
- 590 55. Forsell C, Björk BF, Lilius L, Axelman K, Fabre SF, Fratiglioni L, et al. Genetic association to  
591 the amyloid plaque associated protein gene COL25A1 in Alzheimer’s disease. *Neurobiol*  
592 *Aging*. 2010 Mar;31(3):409–15.
- 593 56. Tong Y, Xu Y, Scearce-Levie K, Ptáček LJ, Fu YH. COL25A1 triggers and promotes  
594 Alzheimer’s disease-like pathology in vivo. *Neurogenetics*. 2010 Feb;11(1):41–52.
- 595 57. Hashimoto T, Fujii D, Naka Y, Kashiwagi-Hakozaki M, Matsuo Y, Matsuura Y, et al.  
596 Collagenous Alzheimer amyloid plaque component impacts on the compaction of  
597 amyloid- $\beta$  plaques. *acta neuropathol commun*. 2020 Dec;8(1):212.
- 598 58. Gonçalves TJM, Boutillon F, Lefebvre S, Goffin V, Iwatsubo T, Wakabayashi T, et al.  
599 Collagen XXV promotes myoblast fusion during myogenic differentiation and muscle  
600 formation. *Sci Rep*. 2019 Dec;9(1):5878.
- 601 59. Tanaka T, Wakabayashi T, Oizumi H, Nishio S, Sato T, Harada A, et al. CLAC-P/Collagen  
602 Type XXV Is Required for the Intramuscular Innervation of Motoneurons during  
603 Neuromuscular Development. *Journal of Neuroscience*. 2014 Jan 22;34(4):1370–9.
- 604 60. Calvo AC, Moreno L, Moreno L, Toivonen JM, Manzano R, Molina N, et al. Type XIX  
605 collagen: a promising biomarker from the basement membranes. *Neural Regen Res*.  
606 2020 Jun;15(6):988–95.
- 607 61. Calvo AC, Cibreiro GA, Merino PT, Roy JF, Galiana A, Rufián AJ, et al. Collagen XIX Alpha 1  
608 Improves Prognosis in Amyotrophic Lateral Sclerosis. *Aging and disease*. 2019;10(2):278.
- 609 62. Juricek L, Coumoul X. The Aryl Hydrocarbon Receptor and the Nervous System. *IJMS*.  
610 2018 Aug 24;19(9):2504.
- 611 63. Hoffmann D, Dvorakova T, Stroobant V, Bouzin C, Daumerie A, Solvay M, et al.  
612 Tryptophan 2,3-Dioxygenase Expression Identified in Human Hepatocellular Carcinoma  
613 Cells and in Intratumoral Pericytes of Most Cancers. *Cancer Immunol Res*. 2020  
614 Jan;8(1):19–31.
- 615 64. Opitz CA, Somarribas Patterson LF, Mohapatra SR, Dewi DL, Sadik A, Platten M, et al.  
616 The therapeutic potential of targeting tryptophan catabolism in cancer. *Br J Cancer*.  
617 2020 Jan 7;122(1):30–44.
- 618 65. Liu JJ, Movassat J, Portha B. Emerging role for kynurenines in metabolic pathologies.  
619 *Current Opinion in Clinical Nutrition & Metabolic Care* [Internet]. 2019;22(1). Available  
620 from: <https://journals.lww.com/co->

621 clinicalnutrition/Fulltext/2019/01000/Emerging\_role\_for\_kynurenines\_in\_metabolic.15.  
622 aspx  
623

624 **Figures**

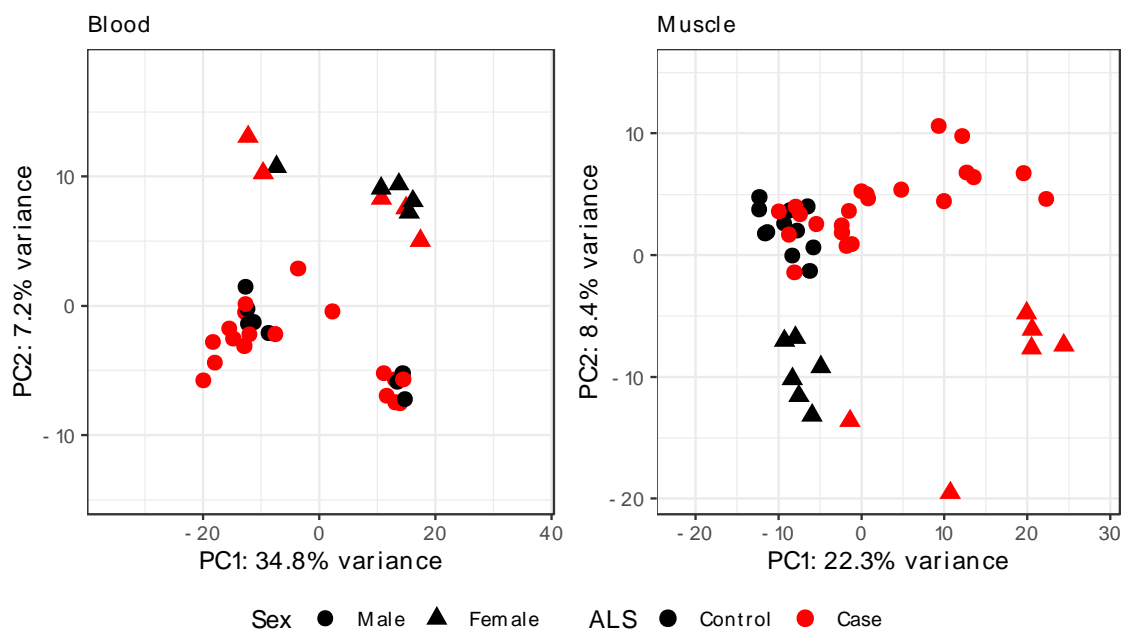

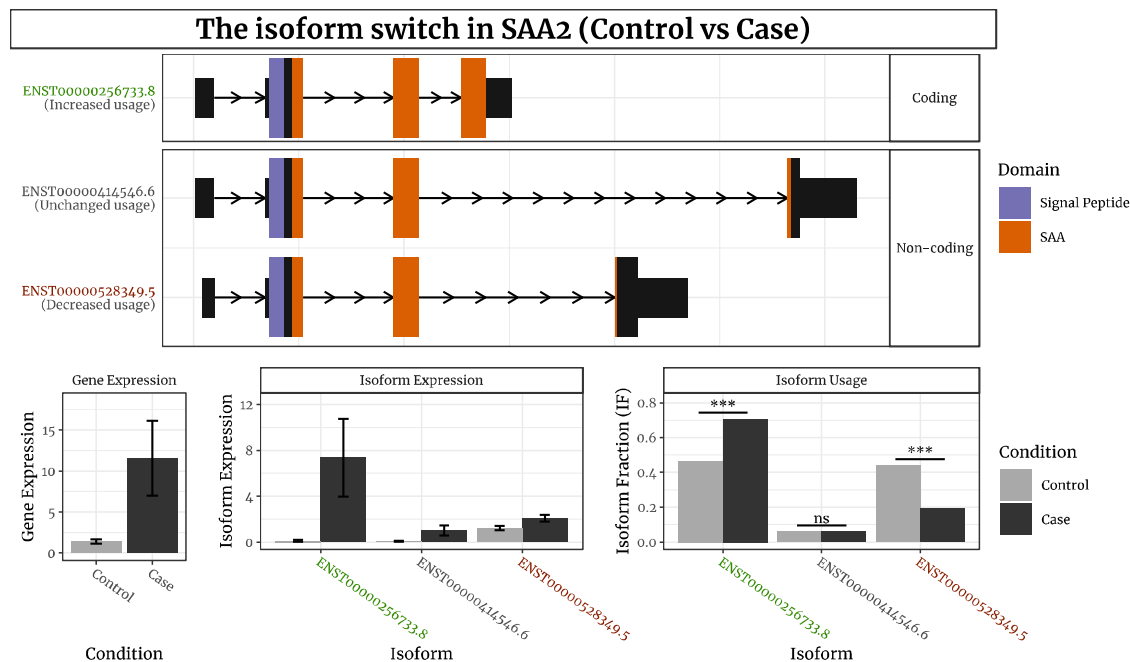

633

634 **Figure 2.** Visualization of isoform expression in the transcriptome-wide significant gene SAA2. The  
 635 coloured plots at the top show three transcripts (detected via Salmon), annotated for their inclusion of  
 636 protein domains as well as the site of their transcription start and termination sites. The top transcript  
 637 is predicted to have high coding potential through CPAT. The bottom graphs individually delineate  
 638 the difference in mean counts between cases and controls in the expression of the gene and its  
 639 constituent isoforms. The rightmost graph indicates the isoform expression as a proportion of the total  
 640 expression across all isoforms within cases and controls separately, indicating a greater proportion of  
 641 expression for the coding variant and a decreased proportion of expression for the second non-coding  
 642 variant.

643

## 644 Tables

645 **Table 1.** Overlap of transcriptome-wide significant differences between MND cases and controls

646 from STAR and Salmon models with log2 fold change and Benjamini-Hochberg adjusted *p*-values.

647 Bolded names are significant in both models. lncRNA: long non-coding RNA; PC: protein coding;

648 PP: processed pseudogene; UP: Unprocessed pseudogene; TUP: transcribed unprocessed pseudogene.

| Name       | Chr | Start       | Length  | Type   | Description                                                            | STAR                |                     |                      | Salmon              |                     |                       |
|------------|-----|-------------|---------|--------|------------------------------------------------------------------------|---------------------|---------------------|----------------------|---------------------|---------------------|-----------------------|
|            |     |             |         |        |                                                                        | log <sub>2</sub> FC | log <sub>2</sub> SE | <i>p</i>             | log <sub>2</sub> FC | log <sub>2</sub> SE | <i>p</i>              |
| AC004490.1 | 19  | 2 212 029   | 3537    | lncRNA | Novel transcript, antisense to dot11                                   | —                   | —                   | —                    | 0.80                | 0.20                | $5.7 \times 10^{-5}$  |
| AC010878.1 | 2   | 37 816 915  | 1047    | PP     | Serine/threonine kinase receptor associated protein (strap) pseudogene | 2.17                | 0.56                | $1.0 \times 10^{-4}$ | 2.89                | 0.63                | $5.4 \times 10^{-6}$  |
| AC013275.1 | 2   | 119 476 428 | 10 919  | lncRNA | Setr antisense rna 1                                                   | -2.96               | 0.74                | $6.0 \times 10^{-5}$ | -2.98               | 0.72                | $4.0 \times 10^{-5}$  |
| AC068580.4 | 11  | 1 734 821   | 29 134  | PC     | Novel protein                                                          | 0.57                | 0.30                | $5.9 \times 10^{-2}$ | 1.79                | 0.41                | $1.3 \times 10^{-5}$  |
| AC087457.1 | 15  | 34 755 084  | 58 422  | lncRNA | Novel transcript, antisense to actc1                                   | 1.61                | 0.36                | $6.0 \times 10^{-6}$ | 0.42                | 0.15                | $5.7 \times 10^{-3}$  |
| AC103740.1 | 15  | 62 827 675  | 56 360  | lncRNA | Novel transcript, antisense to tln2                                    | 0.79                | 0.13                | $3.3 \times 10^{-9}$ | 0.03                | 0.12                | $8.1 \times 10^{-1}$  |
| ACP5       | 19  | 11 574 660  | 4349    | PC     | Acid phosphatase 5, tartrate resistant                                 | -0.49               | 0.28                | $7.4 \times 10^{-2}$ | -1.54               | 0.37                | $3.8 \times 10^{-5}$  |
| ACTC1      | 15  | 34 790 230  | 5320    | PC     | Actin alpha cardiac muscle 1                                           | 1.25                | 0.41                | $2.1 \times 10^{-3}$ | 2.09                | 0.49                | $2.3 \times 10^{-5}$  |
| AHRR       | 5   | 271 670     | 166 622 | PC     | Aryl-hydrocarbon receptor repressor                                    | 4.25                | 0.89                | $2.0 \times 10^{-6}$ | 2.84                | 0.64                | $8.8 \times 10^{-6}$  |
| AL161665.2 | 14  | 32 200 433  | 1304    | lncRNA | Novel transcript                                                       | -0.98               | 0.22                | $8.0 \times 10^{-6}$ | -0.89               | 0.23                | $1.2 \times 10^{-1}$  |
| AL390755.2 | 13  | 110 123 208 | 2027    | TEC    | Tec                                                                    | 1.38                | 0.54                | $1.1 \times 10^{-2}$ | 3.57                | 0.87                | $4.4 \times 10^{-5}$  |
| ANKRD1     | 10  | 90 912 096  | 9181    | PC     | Ankyrin repeat domain 1                                                | 2.24                | 0.47                | $1.4 \times 10^{-6}$ | 2.61                | 0.47                | $2.0 \times 10^{-8}$  |
| AP5M1      | 14  | 57 268 924  | 29 819  | PC     | Adaptor related protein complex 5 subunit mu 1                         | 0.17                | 0.04                | $7.3 \times 10^{-6}$ | 0.18                | 0.14                | $1.9 \times 10^{-1}$  |
| ATP23      | 12  | 57 906 039  | 53 110  | PC     | Atp23 metalloproteinase and atp synthase assembly factor homolog       | -0.30               | 0.17                | $6.9 \times 10^{-2}$ | -1.22               | 0.28                | $1.8 \times 10^{-5}$  |
| BMS1P4     | 10  | 73 715 843  | 14 627  | TUP    | Bms1 pseudogene 4                                                      | 0.42                | 0.10                | $2.9 \times 10^{-5}$ | 0.44                | 0.14                | $1.3 \times 10^{-3}$  |
| CDK4       | 12  | 57 747 727  | 8287    | PC     | Cyclin dependent kinase 4                                              | 0.12                | 0.06                | $3.5 \times 10^{-2}$ | 0.64                | 0.13                | $6.7 \times 10^{-7}$  |
| CDKN2B     | 9   | 22 002 903  | 6403    | PC     | Cyclin dependent kinase inhibitor 2b                                   | 0.84                | 0.19                | $1.4 \times 10^{-5}$ | 0.78                | 0.24                | $1.4 \times 10^{-3}$  |
| CH3L1      | 1   | 203 178 931 | 7774    | PC     | Chitinase 3 like 1                                                     | 2.30                | 0.49                | $3.0 \times 10^{-6}$ | 1.04                | 0.34                | $2.3 \times 10^{-3}$  |
| CHRNA1     | 2   | 174 747 592 | 40 344  | PC     | Cholinergic receptor nicotinic alpha 1 subunit                         | 0.99                | 0.24                | $2.8 \times 10^{-5}$ | 1.22                | 0.28                | $1.6 \times 10^{-5}$  |
| COL19A1    | 6   | 69 866 556  | 345 913 | PC     | Collagen type xix alpha 1 chain                                        | 2.26                | 0.48                | $3.1 \times 10^{-6}$ | 1.16                | 0.37                | $1.9 \times 10^{-3}$  |
| COL25A1    | 4   | 108 808 725 | 494 028 | PC     | Collagen type xxv alpha 1 chain                                        | 1.72                | 0.41                | $2.5 \times 10^{-5}$ | 3.18                | 0.50                | $3.1 \times 10^{-10}$ |
| DCLK1      | 13  | 35 768 652  | 362 655 | PC     | Doublecortin like kinase 1                                             | 1.08                | 0.19                | $2.6 \times 10^{-8}$ | 1.45                | 0.30                | $1.3 \times 10^{-6}$  |
| DLEU2L     | 1   | 63 547 082  | 3555    | lncRNA | Deleted in lymphocytic leukemia 2 like                                 | 1.09                | 0.18                | $4.1 \times 10^{-9}$ | 1.34                | 0.24                | $1.3 \times 10^{-8}$  |
| EFCAB7     | 1   | 63 523 372  | 49 322  | PC     | Ef-hand calcium binding domain 7                                       | 0.77                | 0.16                | $8.7 \times 10^{-7}$ | 0.34                | 0.33                | $3.0 \times 10^{-1}$  |
| ENC1       | 5   | 74 627 406  | 14 019  | PC     | Ectodermal-neural cortex 1                                             | 0.70                | 0.21                | $7.5 \times 10^{-4}$ | 1.14                | 0.27                | $2.3 \times 10^{-5}$  |
| FST        | 5   | 53 480 626  | 6509    | PC     | Follistatin                                                            | 1.39                | 0.31                | $7.5 \times 10^{-6}$ | 1.87                | 0.39                | $1.2 \times 10^{-6}$  |
| KRT80      | 12  | 52 168 996  | 23 019  | PC     | Keratin 80                                                             | 1.95                | 0.53                | $2.2 \times 10^{-4}$ | 2.76                | 0.54                | $3.7 \times 10^{-7}$  |
| LCMT1-AS1  | 16  | 25 085 168  | 26 388  | lncRNA | Lcmt1 antisense rna 1                                                  | 0.36                | 0.14                | $7.8 \times 10^{-3}$ | 1.27                | 0.28                | $4.9 \times 10^{-6}$  |
| LINC00211  | 2   | 37 820 498  | 55 777  | lncRNA | Long intergenic non-protein coding rna 211                             | 2.14                | 0.50                | $1.7 \times 10^{-5}$ | 0.02                | 0.26                | $9.4 \times 10^{-1}$  |
| LINC00626  | 1   | 168 784 012 | 8875    | lncRNA | Long intergenic non-protein coding rna 626                             | —                   | —                   | —                    | 3.62                | 0.71                | $3.8 \times 10^{-7}$  |
| LRRN3      | 7   | 111 091 006 | 34 449  | PC     | Leucine rich repeat neuronal 3                                         | 0.27                | 0.16                | $8.5 \times 10^{-2}$ | 1.43                | 0.34                | $2.1 \times 10^{-5}$  |
| LRTM1      | 3   | 54 918 231  | 48 858  | PC     | Leucine rich repeats and transmembrane domains 1                       | 0.50                | 0.31                | $1.1 \times 10^{-1}$ | 2.95                | 0.68                | $1.2 \times 10^{-5}$  |
| MERTK      | 2   | 111 898 607 | 130 955 | PC     | Mer proto-oncogene, tyrosine kinase                                    | -0.63               | 0.14                | $4.1 \times 10^{-6}$ | -0.80               | 0.29                | $5.8 \times 10^{-3}$  |
| MTCO3P39   | 4   | 49 246 021  | 518     | PP     | Mt-co3 pseudogene 39                                                   | —                   | —                   | —                    | 0.94                | 0.21                | $7.1 \times 10^{-6}$  |
| MTND3P22   | 4   | 49 246 601  | 315     | PP     | Mt-nd3 pseudogene 22                                                   | —                   | —                   | —                    | 1.18                | 0.28                | $2.9 \times 10^{-5}$  |
| MUC19      | 12  | 40 393 395  | 177 438 | PC     | Mucin 19, oligomeric                                                   | -0.37               | 0.39                | $3.5 \times 10^{-1}$ | 3.22                | 0.77                | $2.7 \times 10^{-5}$  |
| MYCL       | 1   | 39 895 426  | 6831    | PC     | Mycl proto-oncogene, bhlh transcription factor                         | 1.40                | 0.36                | $1.1 \times 10^{-4}$ | 1.90                | 0.43                | $9.4 \times 10^{-6}$  |
| NGDN       | 14  | 23 469 689  | 40 174  | PC     | Neuroguidin                                                            | -0.05               | 0.07                | $4.8 \times 10^{-1}$ | -0.27               | 0.07                | $4.4 \times 10^{-5}$  |
| PDESB      | 5   | 77 210 449  | 219 359 | PC     | Phosphodiesterase 8b                                                   | 0.23                | 0.13                | $8.6 \times 10^{-2}$ | 1.90                | 0.41                | $3.8 \times 10^{-6}$  |
| PEG10      | 7   | 94 656 325  | 13 371  | PC     | Paternally expressed 10                                                | 0.62                | 0.22                | $5.7 \times 10^{-3}$ | 1.48                | 0.37                | $5.8 \times 10^{-5}$  |
| PNPLA3     | 22  | 43 923 792  | 40 697  | PC     | Patatin like phospholipase domain containing 3                         | 1.98                | 0.44                | $6.4 \times 10^{-6}$ | 1.42                | 0.35                | $5.6 \times 10^{-5}$  |
| RBM44      | 2   | 237 798 389 | 44 420  | PC     | Rna binding motif protein 44                                           | 0.52                | 0.12                | $1.1 \times 10^{-5}$ | 0.07                | 0.28                | $7.9 \times 10^{-1}$  |
| RIN3       | 14  | 92 513 781  | 175 214 | PC     | Ras and rab interactor 3                                               | -0.44               | 0.11                | $3.7 \times 10^{-5}$ | -0.85               | 0.38                | $2.5 \times 10^{-2}$  |
| SAA1       | 11  | 18 266 660  | 3718    | PC     | Serum amyloid a1                                                       | 3.05                | 0.53                | $9.0 \times 10^{-9}$ | 3.40                | 0.57                | $1.9 \times 10^{-9}$  |
| SAA2-SAA4  | 11  | 18 231 423  | 17 213  | PC     | Saa2-saa4 readthrough                                                  | —                   | —                   | —                    | 4.01                | 0.75                | $8.0 \times 10^{-8}$  |
| SAA2       | 11  | 18 239 223  | 9421    | PC     | Serum amyloid a2                                                       | 2.09                | 0.44                | $1.7 \times 10^{-6}$ | 1.24                | 0.30                | $3.6 \times 10^{-5}$  |
| SHROOM3    | 4   | 76 435 229  | 348 025 | PC     | Shroom family member 3                                                 | 0.85                | 0.33                | $1.0 \times 10^{-2}$ | 2.72                | 0.61                | $6.9 \times 10^{-6}$  |
| SLC47A2    | 17  | 19 678 288  | 40 692  | PC     | Solite carrier family 47 member 2                                      | 1.43                | 0.27                | $1.1 \times 10^{-7}$ | 3.17                | 0.51                | $4.3 \times 10^{-10}$ |
| SP1        | 12  | 53 380 176  | 36 271  | PC     | Sp1 transcription factor                                               | -0.12               | 0.05                | $1.9 \times 10^{-2}$ | -0.26               | 0.06                | $2.2 \times 10^{-5}$  |
| SYT15      | 10  | 46 578 217  | 15 957  | PC     | Synaptotagmin 15                                                       | -0.13               | 0.18                | $4.7 \times 10^{-1}$ | -1.25               | 0.28                | $1.2 \times 10^{-5}$  |
| TDO2       | 4   | 155 854 738 | 65 669  | PC     | Tryptophan 2,3-dioxygenase                                             | 2.76                | 0.63                | $1.3 \times 10^{-5}$ | 4.23                | 0.79                | $8.8 \times 10^{-8}$  |
| VN1R83P    | 19  | 21 289 554  | 445     | UP     | Vomerol nasal 1 receptor 83 pseudogene                                 | 0.70                | 0.17                | $4.5 \times 10^{-5}$ | 0.67                | 0.20                | $7.3 \times 10^{-4}$  |

649

650 **Table 2.** Enriched gene ontology (GO) terms for both Salmon and STAR models, as generated from  
 651 TopGO. The total number of annotated genes from the greater set is followed by the number of those  
 652 which are significantly differentially expressed, as well as the enrichment of the term as calculated by  
 653 Fisher’s exact test. Significant/background genes are subset to those with GO terms (27/14475 for  
 654 salmon and 19/13588 for STAR).

| GO.ID         | Term                                                           | Genes     |                  |          | Fisher <i>p</i>      |
|---------------|----------------------------------------------------------------|-----------|------------------|----------|----------------------|
|               |                                                                | Annotated | Significant      | Expected |                      |
| <b>Salmon</b> |                                                                |           |                  |          |                      |
| GO:0006953    | Acute-phase response                                           | 30        | 2: SAA1, SAA2    | 0.06     | $1.4 \times 10^{-3}$ |
| GO:0055008    | Cardiac muscle tissue morphogenesis                            | 53        | 2: ANKRD1, ACTC1 | 0.10     | $4.4 \times 10^{-3}$ |
| GO:0051965    | Positive regulation of synapse assembly                        | 55        | 2: LRMT1, LRRN3  | 0.10     | $4.7 \times 10^{-3}$ |
| GO:0090130    | Tissue migration                                               | 271       | 2: ACTC1, SP1    | 0.51     | $7.3 \times 10^{-3}$ |
| GO:0045607    | Regulation of inner ear auditory receptor cell differentiation | 5         | 1: MYCL          | 0.01     | $9.3 \times 10^{-3}$ |
| GO:0019441    | Tryptophan catabolic process to kynurenic                      | 5         | 1: TDO2          | 0.01     | $9.3 \times 10^{-3}$ |
| GO:0036155    | Acylglycerol acyl-chain remodeling                             | 5         | 1: PNPLA3        | 0.01     | $9.3 \times 10^{-3}$ |
| GO:0070814    | Hydrogen sulfide biosynthetic process                          | 5         | 1: SP1           | 0.01     | $9.3 \times 10^{-3}$ |
| <b>STAR</b>   |                                                                |           |                  |          |                      |
| GO:0006953    | Acute-phase response                                           | 25        | 2: SAA1, SAA2    | 0.03     | $5.5 \times 10^{-4}$ |
| GO:1903566    | Positive regulation of protein localization to cilium          | 5         | 1: EFCAB7        | 0.01     | $7.0 \times 10^{-3}$ |
| GO:0097350    | Neutrophil clearance                                           | 5         | 1: MERTK         | 0.01     | $7.0 \times 10^{-3}$ |
| GO:0036155    | Acylglycerol acyl-chain remodeling                             | 6         | 1: PNPLA3        | 0.01     | $8.4 \times 10^{-3}$ |
| GO:0060385    | Axonogenesis involved in innervation                           | 6         | 1: COL25A1       | 0.01     | $8.4 \times 10^{-3}$ |
| GO:0051798    | Positive regulation of hair follicle development               | 7         | 1: FST           | 0.01     | $9.7 \times 10^{-3}$ |
| GO:0048630    | Skeletal muscle tissue growth                                  | 7         | 1: CHRNA1        | 0.01     | $9.7 \times 10^{-3}$ |
| GO:1901072    | Glucosamine-containing compound catabolic process              | 7         | 1: CH3L1         | 0.01     | $9.7 \times 10^{-3}$ |

655

656 **Supplemental Information**

657 **Primary supplement.** PDF. Figures S1-S10 and Table S1, S3-S5.

658 **Table S2.** Excel. Complete list of transcriptome-wide genes for each model in each tissue type as well  
659 as their test statistics.

660

661 **Table S6.** Excel. Differentially expressed isoforms as estimated from the IsoformSwitchAnalyzeR  
662 implementation of DEXSeq.
